# Supplementary material for: Nanostripe-Confined Catalyst Formation for Uniform Growth of Ultrathin Silicon Nanowires
Source: Nanomaterials (Basel). 2022 Dec 26;13(1):121. doi: 10.3390/nano13010121 (PMC9824257; doi:10.3390/nano13010121)
Supplement: Supplementary file 1 [file nanomaterials-13-00121-s001.zip › nanomaterials-2071200-supplementary.pdf]

***Supplementary Materials for***

**Nanostripe-confined catalyst formation for uniform growth of  
ultrathin silicon nanowires**

Yinzi Cheng<sup>1</sup>, Xin Gan<sup>1</sup>, Zongguang Liu<sup>1,\*</sup>, Junzhuan Wang<sup>1</sup>, Jun Xu<sup>1</sup>, Kunji Chen<sup>1</sup> and  
Linwei Yu<sup>1,\*</sup>

<sup>1</sup> *School of Electronic Science and Engineering/National Laboratory of Solid-State  
Microstructures, Nanjing University, 210093 Nanjing, China*

*\*Corresponding Email: yulinwei@nju.edu.cn; liuzongguang@nju.edu.cn*

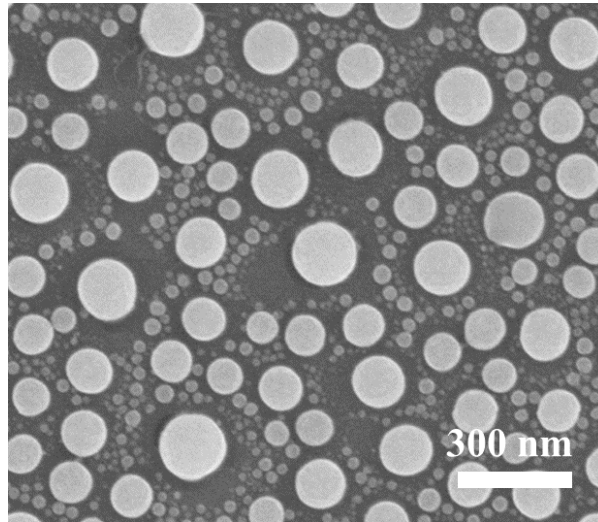

**Figure S1.** The SEM image of the catalyst droplet dispersion on planar surface after H<sub>2</sub> plasma treatment.

The average separation can be estimated from the density by  $d_s = n_{ln}^{-1/2} \sim 244 \text{ nm}$ .

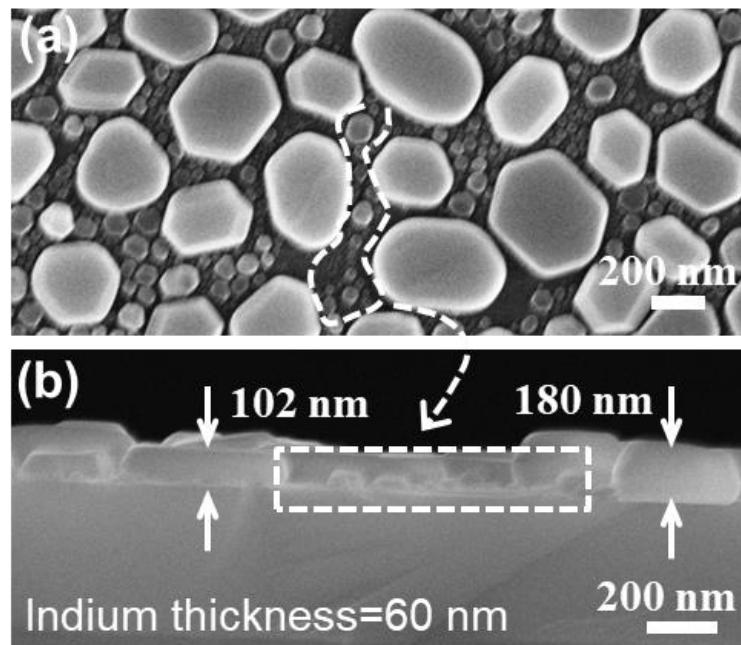

**Figure S2.** (a) The SEM image of In grains deposited on planar surface. (b) The cross-section view of the deposited In grains. The small grains only exist in the spare regions among the large grains, with a much lower height than their larger neighbors.

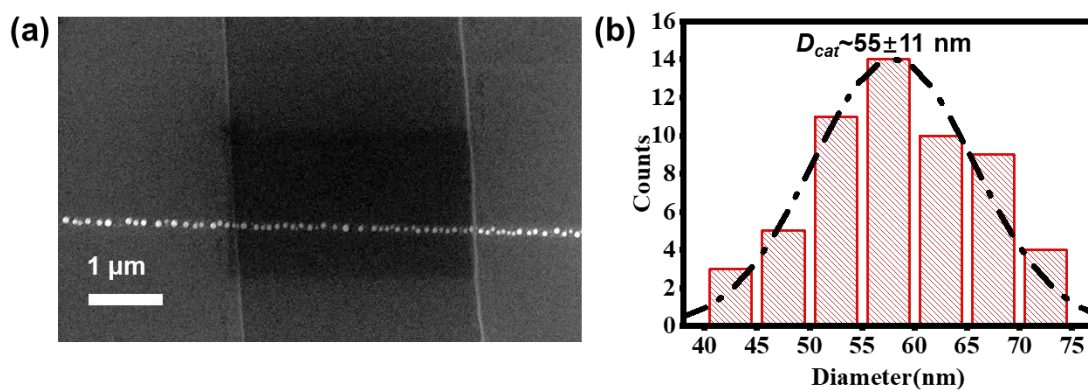

**Figure S3.** (a) SEM image of In droplets formed on 70 nm stripe after  $\text{H}_2$  plasma treatment. (b) The diameter statistics of the as-received In droplets, with  $D_{cat}$  of  $55 \text{ nm} \pm 11 \text{ nm}$ .

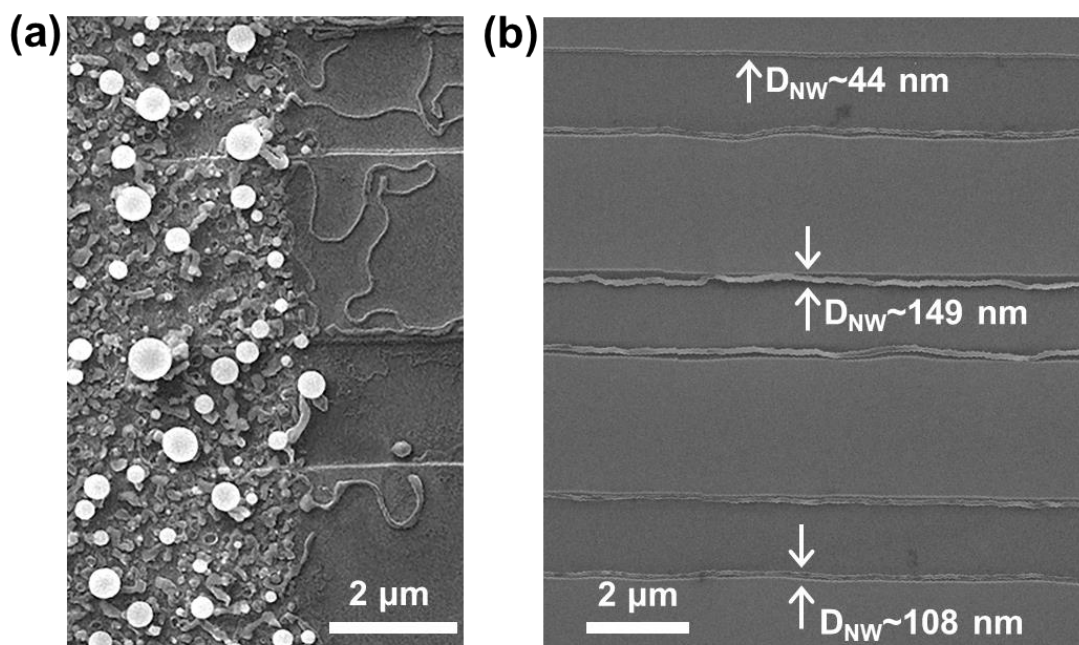

**Figure S4.** The guided growth of SiNW arrays via the IPSLS mode by using catalysts formed within wide stripe ( $> 2 \mu\text{m}$ ), which shows the large diameter variation of formed catalysts (a) and the as-grown SiNW (b).
